# Supplementary material
Source: Springer Nature journal article supplement (https://www.springermedizin.de/resource/supplementary/13063_2012_1089_MOESM1_ESM.pdf/9619322)
Supplement: MOESM1 [file 9619322]

208 Papers identified in PubMed indexed as Randomized-Controlled Trial

40 papers excluded

- 28 editorials/commentaries
- 1 letter
- 3 not reporting on trials
- 3 secondary analyses of trials
- 5 published in 2010

168 trials identified

66 trials excluded

- 1 all authors employed by sponsor
- 65 not fully industry-funded
- 3 same protocols as other trials

12 solely industry-funded trials with apparent independent data management and analysis included in subsample

66 industry trials included
